# Supplementary material
Source: publisher figshare collection journal article supplement (https://karger.figshare.com/ndownloader/files/24152738)
Supplement: Supplementary file 1 [file 24152738]

**Supplemental Appendix A.Eligibility Criteria from Stages 1 and 2 for Inclusion in Stage 3 (Intervention).**

| Stage | Area | Criteria | Assessment tool |
| --- | --- | --- | --- |
| Stage 1:  Screened for eligibility | Children’s speech and/or language | Speech and/or language identified by the caregiver as the primary concern or reason for referral | Caregiver report |
| Caregivers’ access to the Internet | Caregiver had access to the Internet | Caregiver report |
| Caregivers’ English language use | Caregiver had adequate spoken and written English skills to complete caregiver questionnaire | Caregiver report |
| Children’s medical and developmental history | Caregiver reported no significant developmental delay or disability. Stuttering, voice, or feeding was not a primary concern | Caregiver questionnaire  Case history form |
| Stage 2:  Assessed for eligibility following direct comprehensive assessment by the SLP | Children’s speech | Percentage of consonants correct (PCC) standard score ≤6 (i.e., greater than one standard deviation below the mean) or significant caregiver concern about speech production | Diagnostic Evaluation of Articulation and Phonology – Phonology subtest [DEAP; 67]. |
| Children’s language | Standard score for Sentence Structure, Word Structure, or Expressive Vocabulary subtest ≤6 (i.e., greater than one standard deviation below the mean) or significant caregiver concern about language | Clinical Evaluation of Language Fundamentals Preschool – Second Edition – Australian Standardised Edition [CELF-P2; 71]. |
